# Supplementary material for: Spatial Transcriptomic Analysis Reveals Associations between Genes and Cellular Topology in Breast and Prostate Cancers
Source: MDPI journal article supplement (doi:10.3390/cancers14194856), 2022-10-04
Supplement: s1 [file s1]

# Supplementary Materials: Spatial Transcriptomic Analysis Reveals Associations between Genes and Cellular Topology in Breast and Prostate Cancers

Lujain Alsaleh, Chen Li, Justin L. Couetil, Ze Ye, Kun Huang, Jie Zhang, Chao Chen and Travis S. Johnson\*

## Supplementary Figures

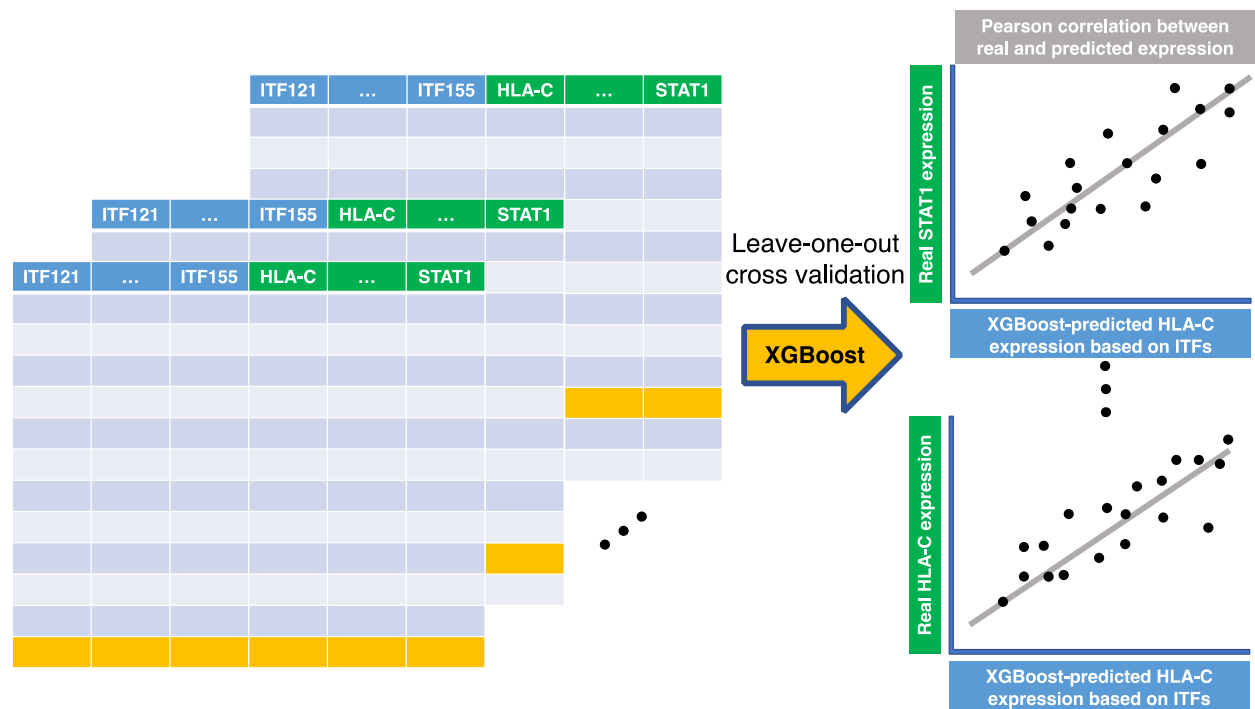

**Figure S1.** Pearson correlation between XGBoost-predicted gene expression based on image topology features and measured gene expression from ST.

## Supplementary Tables

**Table S1.** Summary of correlation analysis and clustering results across all datasets and image feature types.

| Slide ID                          | 1-dimensional Image Topological Features |             |                |                | 0-dimensional Image Topological Features |             |                |                |
|-----------------------------------|------------------------------------------|-------------|----------------|----------------|------------------------------------------|-------------|----------------|----------------|
|                                   | Minimum PCC                              | Maximum PCC | TAG clus- ters | ITF clus- ters | Minimum PCC                              | Maximum PCC | TAG clus- ters | ITF clus- ters |
| Parent Visium Human Breast Cancer | -0.05                                    | 0.25        | 6              | 7              | -0.20                                    | 0.20        | 6              | 4              |
| Parent Human Breast Cancer        | -0.05                                    | 0.25        | 5              | 5              | -0.05                                    | 0.25        | 6              | 5              |
| FFPE Human Breast Cancer          | -0.15                                    | 0.10        | 5              | 5              | -0.15                                    | 0.10        | 5              | 5              |
| Human Prostate Cancer             | -0.40                                    | 0.40        | 5              | 4              | -0.4                                     | 0.4         | 4              | 4              |
| Prostate Acinar Cell Carcinoma    | -0.15                                    | 0.15        | 5              | 5              | -0.1                                     | 0.2         | 5              | 5              |
| FFPE Human Normal Prostate        | -0.2                                     | 0.4         | 5              | 4              | -0.4                                     | 0.4         | 5              | 6              |

**Table S2.** Functional enrichment for TAGs in Parent Visium Human Breast Cancer Slide (1-dimensional Image Topological Features and 0-dimensional Image Topological Features) with the lowest significant  $p$ -values.

| Term Id                                         | Term Name                                                | Adjusted $p$ -Value | Gene Cluster Number |
|-------------------------------------------------|----------------------------------------------------------|---------------------|---------------------|
| <b>1-dimensional Image Topological Features</b> |                                                          |                     |                     |
| GO:0005615                                      | extracellular space                                      | $5.569958e^{-5}$    | 1                   |
| GO:0070062                                      | extracellular exosome                                    | $1.268685e^{-3}$    | 1                   |
| GO:1903561                                      | extracellular vesicle                                    | $1.409804e^{-3}$    | 1                   |
| GO:0043230                                      | extracellular organelle                                  | $1.409804e^{-3}$    | 1                   |
| GO:0065010                                      | Extracellular membrane-bounded organelle                 | $1.409804e^{-3}$    | 1                   |
| HP:0001427                                      | Mitochondrial inheritance                                | $5.697496e^{-8}$    | 2                   |
| HP:0002572                                      | Episodic vomiting                                        | $3.811384e^{-7}$    | 2                   |
| HP:0004309                                      | Ventricular preexcitation                                | $9.907111e^{-7}$    | 2                   |
| HP:0003200                                      | Ragged-red muscle fibers                                 | $1.110454e^{-6}$    | 2                   |
| HP:0000576                                      | Centrocecal scotoma                                      | $1.664157e^{-6}$    | 2                   |
| GO:0002162                                      | Dystroglycan binding                                     | 0.006281256         | 3                   |
| GO:0005584                                      | Collagen type I trimer                                   | 0.0003033615        | 4                   |
| HP:0005623                                      | Absent ossification of calvaria                          | 0.0126888764        | 4                   |
| HP:0003321                                      | Biconcave flattened vertebrae                            | 0.0126888764        | 4                   |
| HP:0005005                                      | Femoral bowing present at birth, straightening with time | 0.0126888764        | 4                   |
| HP:0005897                                      | Severe generalized osteoporosis                          | 0.0126888764        | 4                   |
| CORUM:6822                                      | ZAG-PIP complex                                          | 0.04994746          | 5                   |
| <b>0-dimensional Image Topological Features</b> |                                                          |                     |                     |
| GO:0005615                                      | extracellular space                                      | 0.01631767          | 1                   |
| GO:0070062                                      | extracellular exosome                                    | $3.134382e^{-9}$    | 2                   |
| GO:1903561                                      | extracellular vesicle                                    | $3.774648e^{-9}$    | 2                   |
| GO:0065010                                      | extracellular membrane-bounded organelle                 | $3.774648e^{-9}$    | 2                   |
| GO:0043230                                      | extracellular organelle                                  | $3.774648e^{-9}$    | 2                   |
| GO:0005615                                      | extracellular space                                      | $8.959959e^{-9}$    | 2                   |
| HP:0001427                                      | Mitochondrial inheritance                                | $2.428127e^{-9}$    | 3                   |
| KEGG:05415                                      | Diabetic cardiomyopathy                                  | $1.142388e^{-8}$    | 3                   |
| HP:0004309                                      | Ventricular preexcitation                                | $4.254401e^{-8}$    | 3                   |
| HP:0000576                                      | Centrocecal scotoma                                      | $1.239934e^{-7}$    | 3                   |
| HP:0002572                                      | Episodic vomiting                                        | $1.513199e^{-6}$    | 3                   |
| KEGG:05415                                      | Diabetic cardiomyopathy                                  | 0.02883342          | 4                   |
| GO:0070069                                      | cytochrome complex                                       | 0.03385070          | 4                   |
| KEGG:05012                                      | Parkinson disease                                        | 0.03385070          | 4                   |
| KEGG:05010                                      | Alzheimer disease                                        | 0.04709358          | 4                   |
| CORUM:6822                                      | ZAG-PIP complex                                          | 0.04994746          | 5                   |

**Table S3.** Functional enrichment for TAGs in Parent Human Breast Cancer Slide (1-dimensional Image Topological Features and 0-dimensional Image Topological Features) with the lowest significant  $p$ -values.

| Term Id                                         | Term Name             | Adjusted $p$ -Value | Gene Cluster Number |
|-------------------------------------------------|-----------------------|---------------------|---------------------|
| <b>1-dimensional Image Topological Features</b> |                       |                     |                     |
| GO:0005615                                      | extracellular space   | $5.569958e^{-5}$    | 1                   |
| GO:0070062                                      | extracellular exosome | $1.268685e^{-3}$    | 1                   |
| GO:1903561                                      | extracellular vesicle | $1.409804e^{-3}$    | 1                   |

|                                                 |                                                          |                   |   |
|-------------------------------------------------|----------------------------------------------------------|-------------------|---|
| GO:0043230                                      | extracellular organelle                                  | $1.409804e^{-3}$  | 1 |
| GO:0065010                                      | Extracellular membrane-bounded organelle                 | $1.409804e^{-3}$  | 1 |
| KEGG:05415                                      | Diabetic cardiomyopathy                                  | $9.187864e^{-10}$ | 2 |
| HP:0001427                                      | Mitochondrial inheritance                                | $1.191038e^{-9}$  | 2 |
| HP:0002572                                      | Episodic vomiting                                        | $2.432983e^{-8}$  | 2 |
| HP:0000576                                      | Centrocecal scotoma                                      | $2.455963e^{-8}$  | 2 |
| HP:0004309                                      | Ventricular preexcitation                                | $3.506480e^{-8}$  | 2 |
| GO:0002162                                      | Dystroglycan binding                                     | 0.006281256       | 3 |
| CORUM:6822                                      | ZAG-PIP complex                                          | 00.04994746       | 4 |
| <b>0-dimensional Image Topological Features</b> |                                                          |                   |   |
| GO:0005615                                      | extracellular space                                      | $5.569958e^{-5}$  | 1 |
| GO:0070062                                      | extracellular exosome                                    | $1.268685e^{-3}$  | 1 |
| GO:1903561                                      | extracellular vesicle                                    | $1.409804e^{-3}$  | 1 |
| GO:0043230                                      | extracellular organelle                                  | $1.409804e^{-3}$  | 1 |
| GO:0065010                                      | Extracellular membrane-bounded organelle                 | $1.409804e^{-3}$  | 1 |
| HP:0001427                                      | Mitochondrial inheritance                                | $5.697496e^{-8}$  | 2 |
| HP:0002572                                      | Episodic vomiting                                        | $3.811384e^{-7}$  | 2 |
| HP:0004309                                      | Ventricular preexcitation                                | $9.907111e^{-7}$  | 2 |
| HP:0003200                                      | Ragged-red muscle fibers                                 | $1.110454e^{-6}$  | 2 |
| HP:0000576                                      | Centrocecal scotoma                                      | $1.664157e^{-6}$  | 2 |
| GO:0002162                                      | Dystroglycan binding                                     | 0.006281256       | 3 |
| GO:0005584                                      | collagen type I trimer                                   | 0.0003033615      | 4 |
| HP:0005623                                      | Absent ossification of calvaria                          | 0.0126888764      | 4 |
| HP:0003321                                      | Biconcave flattened vertebrae                            | 0.0126888764      | 4 |
| HP:0005005                                      | Femoral bowing present at birth, straightening with time | 0.0126888764      | 4 |
| HP:0005897                                      | Severe generalized osteoporosis                          | 0.0126888764      | 4 |
| CORUM:6822                                      | ZAG-PIP complex                                          | 0.04994746        | 5 |

**Table S4.** Functional enrichment for TAGs in FFPE Human Breast Cancer Slide (1-dimensional Image Topological Features and 0-dimensional Image Topological Features) with the lowest significant  $p$ -values.

| Term Id                                         | Term Name                                                       | Adjusted $p$ -Value | Gene Cluster Number |
|-------------------------------------------------|-----------------------------------------------------------------|---------------------|---------------------|
| <b>1-dimensional Image Topological Features</b> |                                                                 |                     |                     |
| GO:0070062                                      | extracellular exosome                                           | $2.051973e^{-6}$    | 1                   |
| GO:1903561                                      | extracellular vesicle                                           | $2.362341e^{-6}$    | 1                   |
| GO:0065010                                      | extracellular membrane-bounded organelle                        | $2.362341e^{-6}$    | 1                   |
| GO:0043230                                      | extracellular organelle                                         | $2.362341e^{-6}$    | 1                   |
| GO:0005615                                      | extracellular space                                             | $3.281412e^{-6}$    | 1                   |
| GO:0005615                                      | extracellular space                                             | $2.874349e^{-8}$    | 3                   |
| GO:0005576                                      | extracellular region                                            | $4.032521e^{-6}$    | 3                   |
| GO:0070062                                      | extracellular exosome                                           | $7.746915e^{-6}$    | 3                   |
| GO:1903561                                      | extracellular vesicle                                           | $8.977896e^{-6}$    | 3                   |
| GO:0043230                                      | extracellular organelle                                         | $8.977896e^{-6}$    | 3                   |
| GO:0015453                                      | oxidoreduction-driven active transmembrane transporter activity | $1.196315e^{-9}$    | 4                   |
| KEGG:05415                                      | Diabetic cardiomyopathy                                         | $3.163770e^{-9}$    | 4                   |
| GO:0098803                                      | respiratory chain complex                                       | $5.166699e^{-9}$    | 4                   |

|                                                 |                                                                                                    |                   |   |
|-------------------------------------------------|----------------------------------------------------------------------------------------------------|-------------------|---|
| GO:0070469                                      | respirasome                                                                                        | $1.073422e^{-8}$  | 4 |
| HP:0002572                                      | Episodic vomiting                                                                                  | $1.376587e^{-8}$  | 4 |
| <b>0-dimensional Image Topological Features</b> |                                                                                                    |                   |   |
| GO:0005615                                      | extracellular space                                                                                | $2.175512e^{-5}$  | 1 |
| GO:0070062                                      | extracellular exosome                                                                              | $7.189842e^{-5}$  | 1 |
| GO:1903561                                      | extracellular vesicle                                                                              | $7.519775e^{-5}$  | 1 |
| GO:0043230                                      | extracellular organelle                                                                            | $7.519775e^{-5}$  | 1 |
| GO:0065010                                      | extracellular membrane-bounded organelle                                                           | $7.519775e^{-5}$  | 1 |
| HP:0000576                                      | Centrocecal scotoma                                                                                | $2.634312e^{-11}$ | 2 |
| HP:0001427                                      | Mitochondrial inheritance                                                                          | $1.891416e^{-10}$ | 2 |
| HP:0200125                                      | Mitochondrial respiratory chain defects                                                            | $5.897102e^{-10}$ | 2 |
| HP:0004309                                      | Ventricular preexcitation                                                                          | $2.038573e^{-9}$  | 2 |
| HP:0007763                                      | Retinal telangiectasia                                                                             | $3.471255e^{-9}$  | 2 |
| GO:0005615                                      | extracellular space                                                                                | $2.918838e^{-8}$  | 3 |
| GO:0005576                                      | extracellular region                                                                               | $6.894013e^{-7}$  | 3 |
| GO:0070062                                      | extracellular exosome                                                                              | $8.051882e^{-7}$  | 3 |
| GO:1903561                                      | extracellular vesicle                                                                              | $9.590950e^{-7}$  | 3 |
| GO:0065010                                      | extracellular membrane-bounded organelle                                                           | $9.601088e^{-7}$  | 3 |
| KEGG:05415                                      | Diabetic cardiomyopathy                                                                            | 0.0000012396      | 4 |
| GO:0005584                                      | collagen type I trimer                                                                             | 0.0014950736      | 4 |
| GO:0015453                                      | oxidoreduction-driven active transmembrane transporter activity                                    | 0.0222768962      | 4 |
| CORUM:2886                                      | Respiratory chain complex I (incomplete intermediate ND1, ND2, ND3, CIA30 assembly), mitochondrial | 0.0261210401      | 4 |
| GO:0098803                                      | respiratory chain complex                                                                          | 0.0429815125      | 4 |

**Table S5.** Functional enrichment for TAGs in Human Prostate Cancer Slide (1-dimensional Image Topological Features and 0-dimensional Image Topological Features) with the lowest significant  $p$ -values.

| Term Id                                         | Term Name                                         | Adjusted $p$ -Value | Gene Cluster Number |
|-------------------------------------------------|---------------------------------------------------|---------------------|---------------------|
| <b>1-dimensional Image Topological Features</b> |                                                   |                     |                     |
| GO:0070062                                      | extracellular exosome                             | $8.522469e^{-21}$   | 1                   |
| GO:1903561                                      | extracellular vesicle                             | $1.427739e^{-20}$   | 1                   |
| GO:0065010                                      | extracellular membrane-bounded organelle          | $1.457071e^{-20}$   | 1                   |
| GO:0043230                                      | extracellular organelle                           | $1.457071e^{-20}$   | 1                   |
| GO:0031982                                      | vesicle                                           | $1.842410e^{-20}$   | 1                   |
| MIRNA:hsa-miR-489-5p                            | hsa-miR-489-5p                                    | 0.01172711          | 2                   |
| GO:0010595                                      | positive regulation of endothelial cell migration | 0.03729422          | 2                   |
| REAC:R-HSA-445355                               | Smooth Muscle Contraction                         | $6.325223e^{-10}$   | 3                   |
| GO:0006936                                      | muscle contraction                                | $1.717889e^{-8}$    | 3                   |
| REAC:R-HSA-397014                               | Muscle contraction                                | $7.828103e^{-8}$    | 3                   |
| GO:0003012                                      | muscle system process                             | $9.496920e^{-8}$    | 3                   |
| HPA:0490693                                     | smooth muscle; smooth muscle cells[High]          | $3.967884e^{-7}$    | 3                   |
| GO:0005584                                      | collagen type I trimer                            | 0.001492507         | 4                   |
| HP:0005623                                      | Absent ossification of calvaria                   | 0.003113332         | 4                   |
| HP:0005897                                      | Severe generalized osteoporosis                   | 0.003113332         | 4                   |
| HP:0003321                                      | Biconcave flattened vertebrae                     | 0.003113332         | 4                   |

|                                                 |                                                          |                   |   |
|-------------------------------------------------|----------------------------------------------------------|-------------------|---|
| HP:0005005                                      | Femoral bowing present at birth, straightening with time | 0.003113332       | 4 |
| TF:M07618_1                                     | Factor: SRF; motif: CCTTWTATGGNN; match class: 1         | 0.007103503       | 5 |
| TF:M01304_1                                     | Factor: SRF; motif: NNCCAWAWAAGGV; match class: 1        | 0.007103503       | 5 |
| TF:M12669_1                                     | Factor: SRF; motif: TTNCCTTATWTGGNC; match class: 1      | 0.016334781       | 5 |
| GO:0050998                                      | nitric-oxide synthase binding                            | 0.016997056       | 5 |
| TF:M01007_1                                     | Factor: SRF; motif: CNKNKCCTTATWTGG-NNNN; match class: 1 | 0.044725161       | 5 |
| <b>0-dimensional Image Topological Features</b> |                                                          |                   |   |
| GO:0070062                                      | extracellular exosome                                    | $6.479362e^{-22}$ | 1 |
| GO:1903561                                      | extracellular vesicle                                    | $1.107932e^{-21}$ | 1 |
| GO:0065010                                      | extracellular membrane-bounded organelle                 | $1.132104e^{-21}$ | 1 |
| GO:0043230                                      | extracellular organelle                                  | $1.132104e^{-21}$ | 1 |
| GO:0031982                                      | vesicle                                                  | $3.814630e^{-17}$ | 1 |
| GO:0034599                                      | cellular response to oxidative stress                    | 0.01761702        | 2 |
| GO:0062197                                      | cellular response to chemical stress                     | 0.01927010        | 2 |
| GO:0006979                                      | response to oxidative stress                             | 0.02181185        | 2 |
| REAC:R-HSA-445355                               | Smooth Muscle Contraction                                | $1.115693e^{-7}$  | 3 |
| GO:0006936                                      | muscle contraction                                       | $6.454091e^{-7}$  | 3 |
| REAC:R-HSA-397014                               | Muscle contraction                                       | $2.791592e^{-6}$  | 3 |
| GO:0003012                                      | muscle system process                                    | $2.840664e^{-6}$  | 3 |
| HPA:0490693                                     | smooth muscle; smooth muscle cells[High]                 | $4.850593e^{-6}$  | 3 |
| GO:0005584                                      | collagen type I trimer                                   | 0.001540888       | 4 |
| HP:0003321                                      | Biconcave flattened vertebrae                            | 0.011601258       | 4 |
| HP:0005005                                      | Femoral bowing present at birth, straightening with time | 0.011601258       | 4 |
| HP:0005623                                      | Absent ossification of calvaria                          | 0.011601258       | 4 |
| HP:0005897                                      | Severe generalized osteoporosis                          | 0.011601258       | 4 |

**Table S6.** Functional enrichment for TAGs in Prostate Acinar Cell Carcinoma Slide (1-dimensional Image Topological Features and 0-dimensional Image Topological Features) with the lowest significant *p*-values.

| Term Id                                         | Term Name                                | Adjusted <i>p</i> -Value | Gene Cluster Number |
|-------------------------------------------------|------------------------------------------|--------------------------|---------------------|
| <b>1-dimensional Image Topological Features</b> |                                          |                          |                     |
| GO:0070062                                      | extracellular exosome                    | $1.093617e^{-17}$        | 1                   |
| GO:1903561                                      | extracellular vesicle                    | $1.652514e^{-17}$        | 1                   |
| GO:0065010                                      | extracellular membrane-bounded organelle | $1.678243e^{-17}$        | 1                   |
| GO:0043230                                      | extracellular organelle                  | $1.678243e^{-17}$        | 1                   |
| GO:0031982                                      | vesicle                                  | $2.652779e^{-15}$        | 2                   |
| GO:0005615                                      | extracellular space                      | 0.0002065117             | 2                   |
| GO:0005576                                      | extracellular region                     | 0.0005853319             | 2                   |
| HPA:0471443                                     | skin 2; fibrohistiocytic cells[High]     | 0.0134575912             | 2                   |
| GO:0070062                                      | extracellular exosome                    | 0.0139763283             | 2                   |
| GO:1903561                                      | extracellular vesicle                    | 0.0153151399             | 2                   |
| GO:0071751                                      | secretory IgA immunoglobulin complex     | 0.0001962954             | 3                   |
| GO:0071749                                      | polymeric IgA immunoglobulin complex     | 0.0001962954             | 3                   |
| GO:0071746                                      | IgA immunoglobulin complex, circulating  | 0.0001962954             | 3                   |
| GO:0071745                                      | IgA immunoglobulin complex               | 0.0001962954             | 3                   |

|                                                 |                                           |                   |   |
|-------------------------------------------------|-------------------------------------------|-------------------|---|
| GO:0070062                                      | extracellular exosome                     | 0.0004214256      | 3 |
| REAC:R-HSA-445355                               | Smooth Muscle Contraction                 | 0.001364539       | 4 |
| HPA:0401322                                     | rectum; enterocytes - Microvilli[≥Medium] | 0.001378253       | 4 |
| HPA:0401321                                     | rectum; enterocytes - Microvilli[≥Low]    | 0.002072836       | 4 |
| HP:0002579                                      | Gastrointestinal dysmotility              | 0.002825241       | 4 |
| HP:0030895                                      | Abnormal gastrointestinal motility        | 0.002913245       | 4 |
| GO:0005520                                      | insulin-like growth factor binding        | 0.008985672       | 5 |
| <b>0-dimensional Image Topological Features</b> |                                           |                   |   |
| GO:0044754                                      | Autolysosome                              | 0.0002318339      | 1 |
| GO:0000323                                      | lytic vacuole                             | 0.0003481053      | 1 |
| GO:0005764                                      | Lysosome                                  | 0.0003481053      | 1 |
| GO:0005773                                      | Vacuole                                   | 0.0008109995      | 1 |
| GO:0005767                                      | secondary lysosome                        | 0.0009158836      | 1 |
| GO:0031982                                      | Vesicle                                   | $6.295632e^{-5}$  | 2 |
| GO:0070062                                      | extracellular exosome                     | $2.288019e^{-4}$  | 2 |
| GO:1903561                                      | extracellular vesicle                     | $2.636669e^{-4}$  | 2 |
| GO:0043230                                      | extracellular organelle                   | $2.636669e^{-4}$  | 2 |
| GO:0065010                                      | extracellular membrane-bounded organelle  | $2.636669e^{-4}$  | 2 |
| GO:0070062                                      | extracellular exosome                     | $1.861833e^{-13}$ | 3 |
| GO:1903561                                      | extracellular vesicle                     | $2.639846e^{-13}$ | 3 |
| GO:0065010                                      | extracellular membrane-bounded organelle  | $2.672183e^{-13}$ | 3 |
| GO:0043230                                      | extracellular organelle                   | $2.672183e^{-13}$ | 3 |
| GO:0005615                                      | extracellular space                       | $2.010480e^{-12}$ | 3 |
| GO:0071745                                      | IgA immunoglobulin complex                | $4.459986e^{-6}$  | 4 |
| GO:0071751                                      | secretory IgA immunoglobulin complex      | $4.459986e^{-6}$  | 4 |
| GO:0071749                                      | polymeric IgA immunoglobulin complex      | $4.459986e^{-6}$  | 4 |
| GO:0071746                                      | IgA immunoglobulin complex, circulating   | $4.459986e^{-6}$  | 4 |
| GO:0005615                                      | extracellular space                       | $1.141363e^{-3}$  | 4 |
| REAC:R-HSA-445355                               | Smooth Muscle Contraction                 | 0.001364539       | 5 |
| HPA:0401322                                     | rectum; enterocytes - Microvilli[≥Medium] | 0.001378253       | 5 |
| HPA:0401321                                     | rectum; enterocytes - Microvilli[≥Low]    | 0.002072836       | 5 |
| HP:0002579                                      | Gastrointestinal dysmotility              | 0.002825241       | 5 |
| HP:0030895                                      | Abnormal gastrointestinal motility        | 0.002913245       | 5 |

**Table S7.** Functional enrichment for TAGs in Visium FFPE Human Normal Prostate Slide (1-dimensional Image Topological Features and 0-dimensional Image Topological Features) with the lowest significant *p*-values.

| Term Id                                         | Term Name                                | Adjusted <i>p</i> -Value | Gene Cluster Number |
|-------------------------------------------------|------------------------------------------|--------------------------|---------------------|
| <b>1-dimensional Image Topological Features</b> |                                          |                          |                     |
| GO:0070062                                      | extracellular exosome                    | $1.603815e^{-13}$        | 1                   |
| GO:1903561                                      | extracellular vesicle                    | $2.219204e^{-13}$        | 1                   |
| GO:0043230                                      | extracellular organelle                  | $2.240562e^{-13}$        | 1                   |
| GO:0065010                                      | extracellular membrane-bounded organelle | $2.240562e^{-13}$        | 1                   |
| GO:0005615                                      | extracellular space                      | $8.853403e^{-10}$        | 1                   |
| GO:0062023                                      | collagen-containing extracellular matrix | $6.700992e^{-5}$         | 2                   |
| GO:0031012                                      | extracellular matrix                     | $3.520194e^{-4}$         | 2                   |
| GO:0030312                                      | external encapsulating structure         | $3.520194e^{-4}$         | 2                   |
| CORUM:2254                                      | CTGF/Hcs24-actin(beta/gamma) complex     | $2.231109e^{-3}$         | 2                   |
| GO:0005615                                      | extracellular space                      | $5.403000e^{-3}$         | 2                   |
| GO:0043230                                      | extracellular organelle                  | $9.806696e^{-8}$         | 3                   |
| GO:0005576                                      | extracellular region                     | $3.037689e^{-6}$         | 3                   |

|                                                 |                                                    |                   |   |
|-------------------------------------------------|----------------------------------------------------|-------------------|---|
| GO:0070887                                      | cellular response to chemical stimulus             | $8.624522e^{-4}$  | 3 |
| GO:0010033                                      | response to organic substance                      | $8.624522e^{-4}$  | 3 |
| GO:0071310                                      | cellular response to organic substance             | $8.624522e^{-4}$  | 3 |
| REAC:R-HSA-445355                               | Smooth Muscle Contraction                          | $1.111645e^{-14}$ | 4 |
| HPA:0490693                                     | smooth muscle; smooth muscle cells[High]           | $3.736946e^{-12}$ | 4 |
| GO:0006936                                      | muscle contraction                                 | $8.389078e^{-12}$ | 4 |
| REAC:R-HSA-397014                               | Muscle contraction                                 | $3.763786e^{-11}$ | 4 |
| GO:0015629                                      | actin cytoskeleton                                 | $4.049754e^{-11}$ | 4 |
| <b>0-dimensional Image Topological Features</b> |                                                    |                   |   |
| GO:0070062                                      | extracellular exosome                              | $6.127363e^{-10}$ | 1 |
| GO:1903561                                      | extracellular vesicle                              | $7.797512e^{-10}$ | 1 |
| GO:0065010                                      | extracellular membrane-bounded organelle           | $7.797512e^{-10}$ | 1 |
| GO:0043230                                      | extracellular organelle                            | $7.797512e^{-10}$ | 1 |
| GO:0005615                                      | extracellular space                                | $1.210568e^{-7}$  | 1 |
| GO:0070062                                      | extracellular exosome                              | $1.870788e^{-6}$  | 2 |
| GO:1903561                                      | extracellular vesicle                              | $2.204394e^{-6}$  | 2 |
| GO:0065010                                      | extracellular membrane-bounded organelle           | $2.204394e^{-6}$  | 2 |
| GO:0043230                                      | extracellular organelle                            | $2.204394e^{-6}$  | 2 |
| GO:0005615                                      | extracellular space                                | $4.329608e^{-4}$  | 2 |
| GO:0062023                                      | collagen-containing extracellular matrix           | 0.001950355       | 3 |
| GO:0031012                                      | extracellular matrix                               | 0.007442751       | 3 |
| GO:0030312                                      | external encapsulating structure                   | 0.007442751       | 3 |
| TF:M07618_1                                     | Factor: SRF; motif: CCTTWTATGGNN; match class: 1   | 0.043463755       | 3 |
| TF:M01304_1                                     | Factor: SRF; motif: NNCCA WAWAAGGV; match class: 1 | 0.043463755       | 3 |
| GO:0005615                                      | extracellular space                                | $3.635334e^{-8}$  | 4 |
| GO:0005576                                      | extracellular region                               | $4.175812e^{-6}$  | 4 |
| GO:0070062                                      | extracellular exosome                              | $2.636948e^{-4}$  | 4 |
| GO:1903561                                      | extracellular vesicle                              | $2.993143e^{-4}$  | 4 |
| GO:0065010                                      | extracellular membrane-bounded organelle           | $2.993143e^{-4}$  | 4 |
| REAC:R-HSA-445355                               | Smooth Muscle Contraction                          | $1.111645e^{-14}$ | 5 |
| HPA:0490693                                     | smooth muscle; smooth muscle cells[High]           | $3.736946e^{-12}$ | 5 |
| GO:0006936                                      | muscle contraction                                 | $8.389078e^{-12}$ | 5 |
| REAC:R-HSA-397014                               | Muscle contraction                                 | $3.763786e^{-11}$ | 5 |
| GO:0015629                                      | actin cytoskeleton                                 | $4.049754e^{-11}$ | 5 |

**Table S8.** Pearson correlation coefficients for predicted gene expression vs. true gene expression from XGBoost and LightGBM models.

| Gene   | LightGBM  | XGBoost   |
|--------|-----------|-----------|
| HLA-C  | 0.5740936 | 0.5590423 |
| HLA-E  | 0.5414152 | 0.5277748 |
| CIRBP  | 0.5209353 | 0.5027015 |
| STAT1  | 0.5194179 | 0.4905116 |
| NFKBIA | 0.5238297 | 0.5100563 |
| DDX17  | 0.5535355 | 0.5467688 |
| IFI44L | 0.4880083 | 0.4724115 |
| PFN1   | 0.5774745 | 0.5617051 |
| GUK1   | 0.5128658 | 0.4948653 |
| SERF2  | 0.5470236 | 0.5302537 |
| SQSTM1 | 0.4924199 | 0.4821771 |

|          |           |           |
|----------|-----------|-----------|
| DDX5     | 0.5233507 | 0.5189854 |
| HSP90AB1 | 0.5078897 | 0.4966268 |
| HSPA8    | 0.5211847 | 0.5112679 |
| TAGLN2   | 0.5142726 | 0.5042566 |
| PRRC2B   | 0.4864269 | 0.4828521 |
| NCL      | 0.5032294 | 0.4868199 |
| IFITM3   | 0.5146741 | 0.5020230 |
| UBB      | 0.5289144 | 0.5132720 |
